# Supplementary material for: The estrogen receptor 1 gene affects bone mineral density and osteoporosis treatment efficiency in Slovak postmenopausal women
Source: Springer Nature journal article supplement (doi:10.1186/s12881-018-0684-8), 2018-09-21
Supplement: MOESM1 [file 16143404]

## ANAMNESTIC QUESTIONNAIRE FOR OSTEOLOGICAL EXAMINATION

(fill in the form with text, numbers or check  that apply)

Name: \_\_\_\_\_ Date: \_\_\_\_\_

Primary care physician \_\_\_\_\_

### A. General Information

1. Your gender:  Male  Female
2. Date of your birth: \_\_\_\_\_
3. Your current height: \_\_\_\_\_ cm and weight: \_\_\_\_\_ kg  
What was your tallest height (at around the age of 30)? \_\_\_\_\_ cm
4. Your marital status:  Single  Married  Divorced or Widowed
5. Education level :  Elementary/primary  High school/secondary school  
 College or university

### B Bone health history

1. Does osteoporosis run in your family?  Yes  No  
If YES, who suffered?  Mother  Father  Other(s) \_\_\_\_\_
2. Has either of your parents broken a bone after the age of 50?  Yes  No  
If YES, who suffered?  
 Mother What bone(s) did she break? \_\_\_\_\_ At what age? \_\_\_\_\_  
 Father What bone(s) did he break? \_\_\_\_\_ At what age? \_\_\_\_\_
3. Have you ever had a densitometry (bone mineral density, BMD) test done?  Yes  No  
If YES, what was the T-score? \_\_\_\_\_ Date of bone density scan \_\_\_\_\_
4. Have you ever broken a bone?  Yes  No  
If YES, what bone(s) did you break? \_\_\_\_\_ At what age? \_\_\_\_\_  
If YES, how did you break the bone(s)?  Low impact injury (stumble, slip or simple fall)  
 Fall down more than 1 stair or off a ladder  Accident (car or motorcycle accident)  
 High impact sports injury  Other: \_\_\_\_\_
5. Have you been diagnosed and treated by a doctor of the following specialisation?  
 rheumatology  orthopedics  gynecology  oncology  endocrinology  
 diabetology  cardiology  general practitioner  none of these
6. Have you ever had any serious illness?  Yes  No  
If YES, please specify: \_\_\_\_\_
7. Have you ever taken steroids, corticoids, or hormones?  Yes  No  
If YES, provide a list of medications and time of treatments: \_\_\_\_\_
8. Do you take any of medications for osteoporosis treatment?  Yes  No  
If YES, provide a list of all medications that you take:  
\_\_\_\_\_

### C Activity and lifestyle

1. Your occupation is:  Sedentary  With a movement during a work  
 With a very active movement during a work
2. Would you describe yourself as a physically active individual?  No  Yes, all my life  
 Yes, when I was younger  Yes, more recently

3. How many kilometers do you walk on a daily basis? \_\_\_\_\_ km
4. Your average daily housework time: \_\_\_\_\_ hours
5. Your daily sit-in time: \_\_\_\_\_ hours (including watching computers, TV)
6. Do you do any regular exercises?  No, never go to exercise     1-2 times / week  
 3-5 times / week     > 5 times / week  
 If YES, what type of exercise do you do? \_\_\_\_\_
7. Do you smoke cigarettes?  Never     Yes, average \_\_\_ cigarettes/day  
 Used to, I stopped \_\_\_ years ago
8. Do you drink alcohol?  No     Yes, average \_\_\_ drinks/day  
 Used to, I stopped \_\_\_ years ago
9. Do you drink coffee:  No     Yes, average \_\_\_ drinks/day  
 Used to, I stopped \_\_\_ years ago
10. Do you consume dairy products daily?  No     1-2 servings daily     3-4 servings daily  
 5 or more servings daily  
 If YES, what type of products do you consume most often? \_\_\_\_\_

D For women

1. Age at your first menstrual cycle: \_\_\_\_\_ years.
2. Your menstrual cycles are/were:  regular with menstrual cycle \_\_\_ days     irregular
3. Have you gone through menopause?  Yes     No  
 If YES, what was age or date of last menstrual period? \_\_\_\_\_
4. Number of pregnancies: \_\_\_\_\_ If none, was this due to infertility?  Yes     No
5. Number of births: \_\_\_\_\_ Your age at time of your first delivery: \_\_\_\_\_
6. Have you had a hysterectomy?  Yes, at age of \_\_\_\_\_     No
7. Have you had yours ovaries removed?  No     Both, at age of \_\_\_\_\_  
 One, at age of \_\_\_\_\_
8. Have you ever taken menopausal hormones?  Yes, \_\_\_\_\_ years long     No
9. Have you used hormone replacement/estrogen therapy?  Yes, from \_\_\_\_\_ to \_\_\_\_\_  
 No
